# Supplementary material for: Diversity of Freshwater Mollusks from Lake Pampulha, Municipality of Belo Horizonte, Minas Gerais, Brazil
Source: MDPI journal article supplement (doi:10.3390/d16040193), 2024-03-24
Supplement: s1 [file diversity-2825898-SI.pdf › diversity-2825898-SI.pdf]

# Supplementary Materials:

Table S1 - Malacofauna of Lake Pampulha, Belo Horizonte, MG, Brazil: An Integrative Analysis Based on Literature Data, Scientific Collections and Updated Survey

| Specimens                                           | References and queries in databases of scientific collections |                    |             |                 |              |                         |                      | Current work |
|-----------------------------------------------------|---------------------------------------------------------------|--------------------|-------------|-----------------|--------------|-------------------------|----------------------|--------------|
|                                                     | Milward-de-Andrade, 1959                                      | Pinto-Coelho, 2001 | Pinto, 2013 | Montresor, 2015 | Mozzer, 2015 | Collection CMM-IRR 2023 | Collection UERJ 2023 |              |
| <i>Biomphalaria glabrata</i> (Say, 1818)            | X                                                             |                    | X           |                 |              | X                       |                      |              |
| <i>Biomphalaria straminea</i> (Dunker, 1848)        |                                                               | X                  | X           |                 |              | X                       |                      | X            |
| <i>Biomphalaria tenagophila</i> (d'Orbigny, 1835)   | X                                                             | X                  | X           |                 |              | X                       |                      |              |
| <i>Biomphalaria schrammi</i> (Crosse, 1864)         | X                                                             |                    |             |                 |              |                         |                      |              |
| <i>Biomphalaria kuhniana</i> (Clessin, 1883)        |                                                               |                    |             |                 |              | X                       |                      | X            |
| <i>Biomphalaria occidentalis</i> Paraense, 1981     |                                                               |                    |             |                 |              | X                       |                      | X            |
| <i>Drepanotrema cimex</i> (Moricand, 1838)          | X                                                             | X                  |             |                 |              |                         |                      | X            |
| <i>Drepanotrema Depressissimum</i> (Moricand, 1839) |                                                               | X                  |             |                 |              |                         |                      |              |
| <i>Drepanotrema lucidum</i> (L. Pfeiffer, 1839)     | X                                                             |                    |             |                 |              |                         |                      |              |
| <i>Pomacea haustum</i> (Reeve, 1856)                | X                                                             | X                  |             |                 |              |                         |                      |              |
| <i>Pomacea maculata</i> Perry, 1810                 |                                                               |                    |             |                 |              |                         |                      | X            |
| <i>Pomacea canaliculata</i> (Lamarck, 1822)         |                                                               |                    |             |                 | X            |                         |                      |              |
| <i>Pomacea dolidoides</i> (Reeve, 1856)             |                                                               |                    |             | X               |              |                         |                      |              |
| <i>Pomacea</i> sp.                                  |                                                               |                    | X           |                 |              |                         |                      |              |
| <i>Stenophysa marmorata</i> (Guilding, 1828)        |                                                               |                    | X           |                 |              |                         |                      | X            |
| <i>Physa acuta</i> Draparnaud, 1805                 |                                                               |                    | X           | X               |              |                         |                      | X            |
| <i>Stenophysa marmorata</i> (Guilding, 1828)        | X                                                             | X                  | X           |                 |              |                         |                      | X            |
| <i>Gundlachia ticaga</i> (Marcus & Marcus, 1962)    |                                                               |                    |             |                 |              |                         | X                    | X            |
| <i>Hebetancylus moricandi</i> (d'Orbigny, 1837)     |                                                               |                    |             |                 |              |                         | X                    |              |
| <i>Melanoides tuberculata</i> (O. F. Müller, 1774)  |                                                               | X                  | X           |                 |              |                         |                      | X            |
| <i>Pseudosuccinea columella</i> (Say, 1817)         | X                                                             | X                  |             |                 |              |                         | X                    | X            |
| <i>Omalonyx matheroni</i> (Pontiez & Michaud, 1835) |                                                               |                    |             | X               |              |                         |                      | X            |
| <i>Corbicula largillierti</i> (Philippi, 1844)      |                                                               |                    |             |                 |              |                         |                      | X            |
| <i>Pisidium</i> sp.                                 | X                                                             | X                  |             |                 |              |                         |                      |              |
| <i>Ancylus</i> sp.                                  | X                                                             |                    |             |                 |              |                         |                      |              |

CMM-IRR: Coleção de Malacologia Médica – René Rachou Institute (Oswaldo Cruz Foundation) – Minas Gerais, Brazil  
CM-UERJ: Coleção Malacologica da Universidade Estadual do Rio de Janeiro – Rio de Janeiro State University, Rio de Janeiro, Brazil
